# Supplementary material for: New cytotoxic cembrane based diterpenes from the soft corals Sarcophyton cherbonnieri and Nephthea sp.Electronic supplementary information (ESI) available: Mosher results for compound 3. See http://www.rsc.org/suppdata/ob/b2/b210039h/
Source: Royal Society of Chemistry journal article supplement (doi:10.1039/b210039h), 2003-02-24
Supplement: b210039h.doc [file b210039h.doc]

Supplementary Material for Organic & Biomolecular Chemistry

This journal is © The Royal Society of Chemistry 2003

Supplementary data

MTPA-Mosher result with compound **3**

(RS = R-S) [ppm]
